# Supplementary material for: Low cost and green preparation process for α-Fe2O3@gum arabic electrode for high performance sodium ion batteries
Source: Royal Society of Chemistry journal article supplement (doi:10.1039/c6ta08918f), 2016-12-14
Supplement: c6ta08918f1.pdf [file c6ta08918f1.pdf]

Supplemental Information

**A low cost and green preparation process of  $\alpha$ -Fe<sub>2</sub>O<sub>3</sub> @gum  
arabic electrode for high performance sodium ion battery**

*Li Xu<sup>a,b</sup>, Hansinee Sitinamaluwa<sup>c</sup>, Henan Li<sup>a,c</sup>, Jingxia Qiu<sup>a</sup>, Yazhou Wang<sup>b</sup>, Cheng Yan<sup>c</sup>, Huaming  
Li<sup>a,\*</sup>, Shouqi Yuan<sup>a</sup>, Shanqing Zhang<sup>b,\*</sup>*

*a Institute for Energy Research, School of Chemistry and Chemical Engineering,  
Jiangsu University, Zhenjiang 212013, P. R. China*

*b Centre for Clean Environment and Energy, Griffith School of Environment,  
Gold Coast Campus, Griffith University, QLD 4222, Australia*

*c School of Chemistry, Physics and Mechanical Engineering, Queensland  
University of Technology, Brisbane, QLD 4001, Australia.*

\*Corresponding authors:

Prof. Huaming Li, email: [lhm@ujs.edu.cn](mailto:lhm@ujs.edu.cn)

Prof. Shanqing Zhang, email: [s.zhang@griffith.edu.au](mailto:s.zhang@griffith.edu.au)

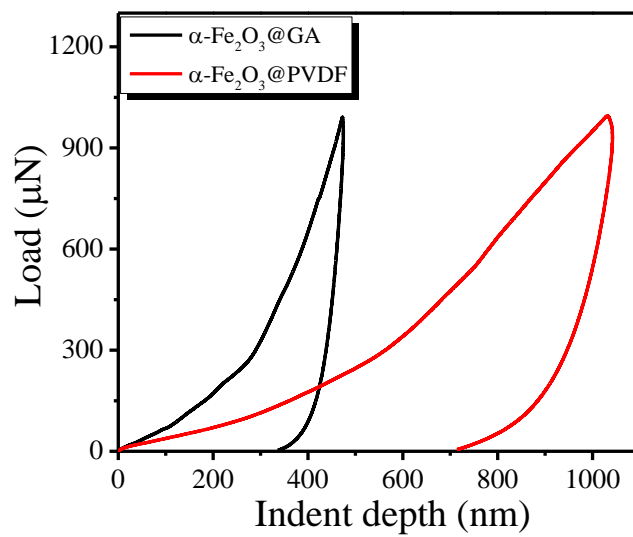

Fig. S1 Nanoscratch and indentation tests for  $\alpha$ -Fe<sub>2</sub>O<sub>3</sub>@GA and  $\alpha$ -Fe<sub>2</sub>O<sub>3</sub>@PVDF electrodes with the force of 1000  $\mu$ N.

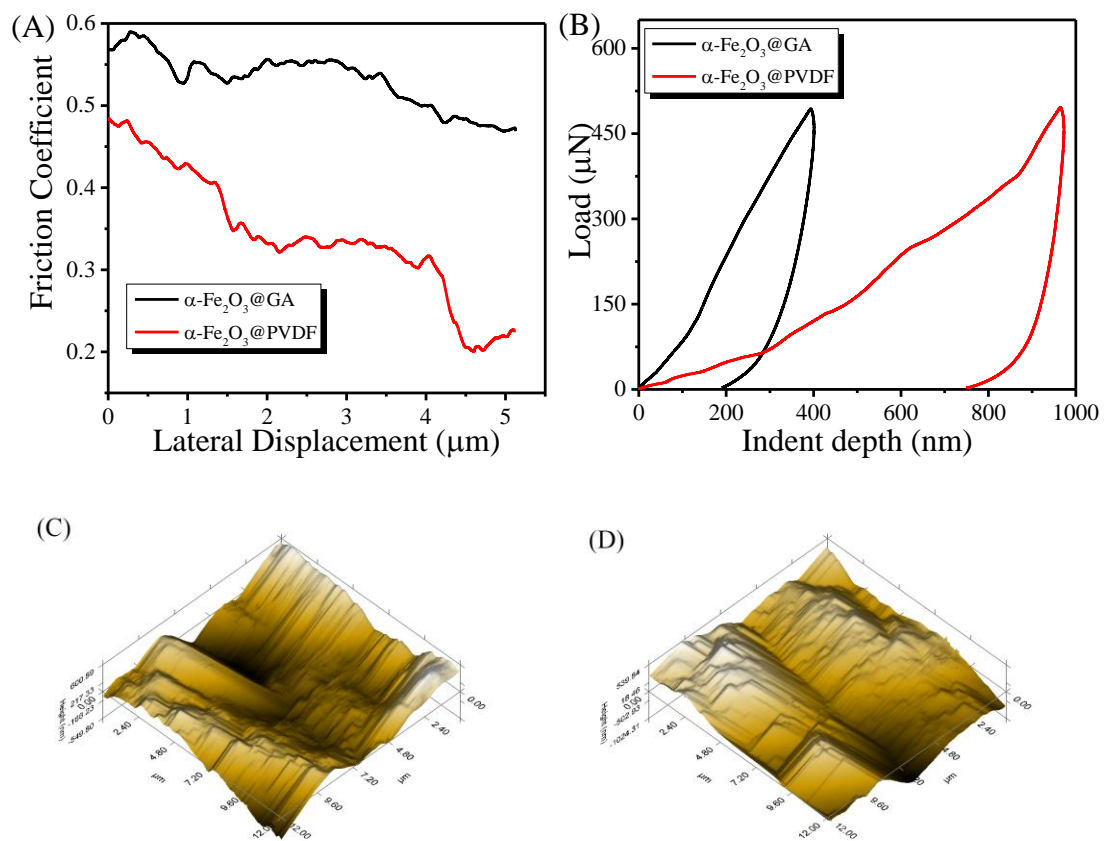

Fig. S2 Nanoscratch tests (A) and nanoindentation tests (B) for  $\alpha\text{-Fe}_2\text{O}_3$ @GA and  $\alpha\text{-Fe}_2\text{O}_3$ @PVDF electrodes after electrolyte uptake; 3D in-situ nanoscratch image of  $\alpha\text{-Fe}_2\text{O}_3$ @GA (C) and  $\alpha\text{-Fe}_2\text{O}_3$ @PVDF (D) electrodes after electrolyte uptake by nanoscratch tests.

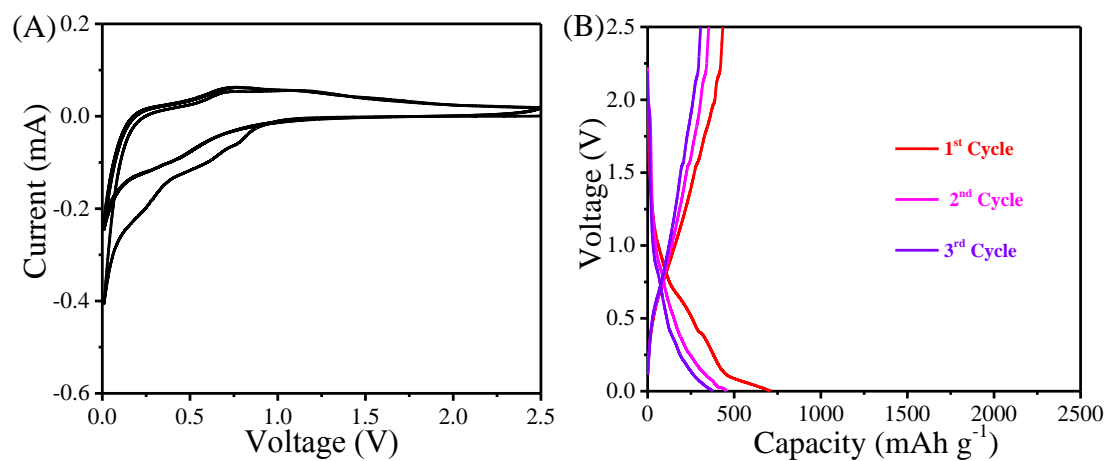

Fig. S3 (A) Cyclic voltammetry curves of the  $\alpha\text{-Fe}_2\text{O}_3\text{@PVDF}$  electrodes; and (B) voltage capacity profiles of the  $\alpha\text{-Fe}_2\text{O}_3\text{@PVDF}$  electrodes at a current density of  $0.2 \text{ A g}^{-1}$ .

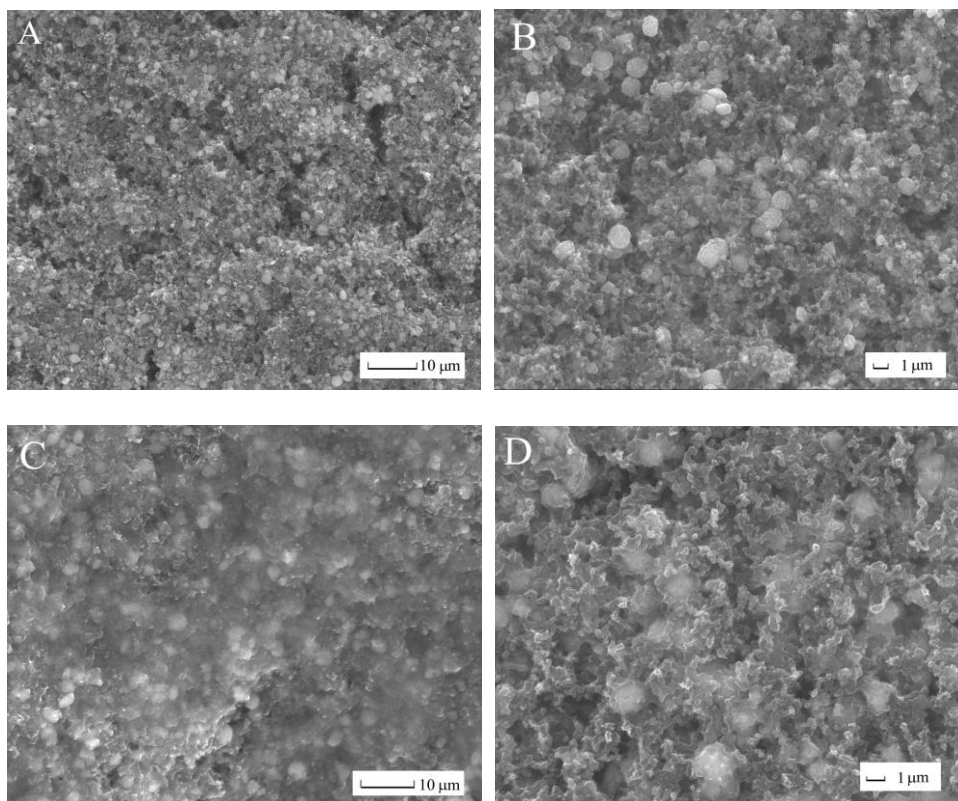

Fig. S4 SEM images of the  $\alpha$ -Fe<sub>2</sub>O<sub>3</sub>@GA electrode before (A,B) and after (C,D) 500 cycles.

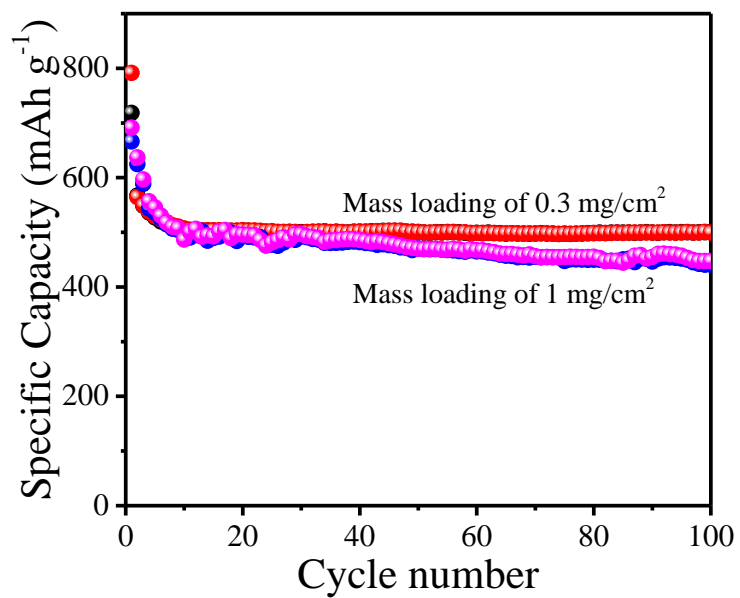

Fig. S5 Cyclic performance of the  $\alpha$ -Fe<sub>2</sub>O<sub>3</sub>@GA electrode at different mass loading.

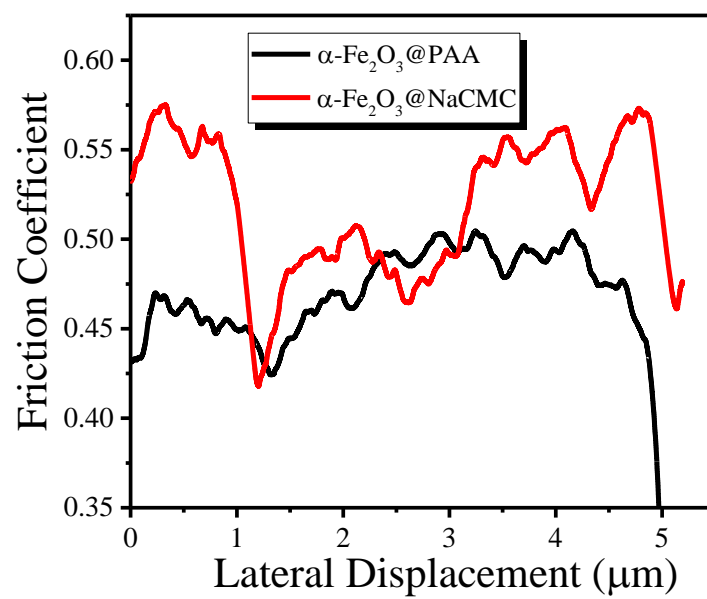

Fig. S6 Nanoscratch tests for  $\alpha\text{-Fe}_2\text{O}_3\text{@PAA}$  and  $\alpha\text{-Fe}_2\text{O}_3\text{@NaCMC}$  electrodes

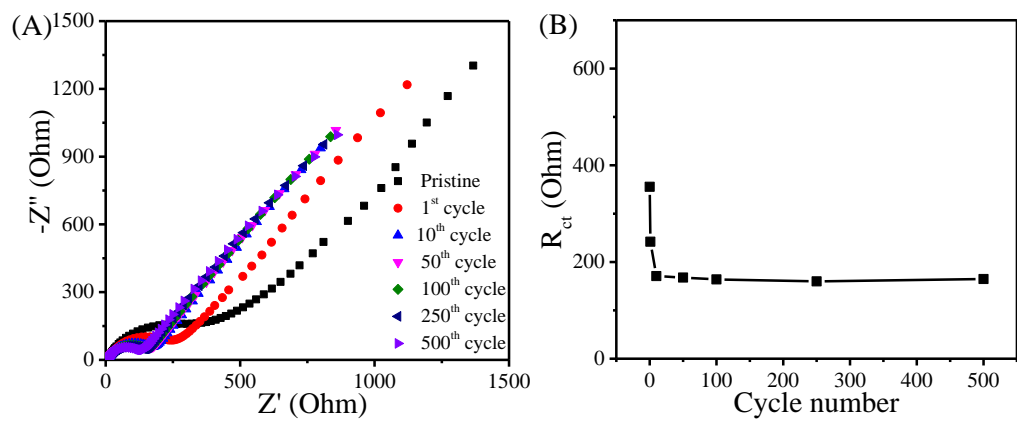

Fig. S7 EIS of the  $\alpha$ -Fe<sub>2</sub>O<sub>3</sub>@GA electrode after different cycles.



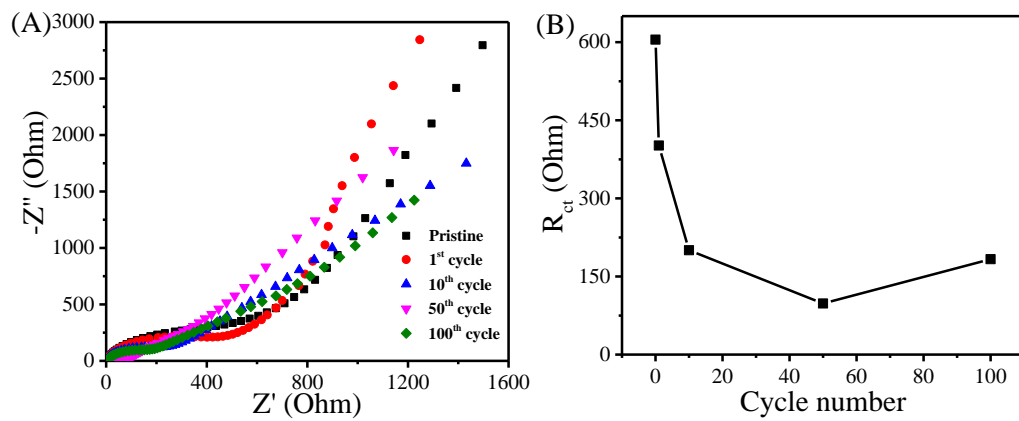

Fig. S8 EIS of the  $\alpha$ -Fe<sub>2</sub>O<sub>3</sub>@PVDF electrode after different cycles.
